# Supplementary material for: A Methodological Framework for Assessing the Influence of Process Parameters on Strand Stability and Functional Performance in Fused Filament Fabrication
Source: MDPI journal article supplement (doi:10.3390/ma16247530), 2023-12-06
Supplement: s1 [file s1]

## Supporting Information (SI)

### A methodological framework for assessing the influence of process parameters on strand stability and functional performance in Fused Filament Fabrication

Eleni Gkartzou <sup>1</sup>, Artemis Kontiza <sup>1†</sup>, Konstantinos Zafeiris <sup>1†</sup>, Elena Mantzavinou <sup>1</sup> and Costas Charitidis <sup>1,\*</sup>

<sup>1</sup> Research Lab of Advanced, Composite, Nano-Materials and Nanotechnology (R-NanoLab), School of Chemical Engineering, National Technical University of Athens, 9 Heroon Polytechniou, GR-15780, Greece

<sup>†</sup> These authors contributed equally to this work

\*Correspondence: charitidis@chemeng.ntua.gr;

**Table S1.** List of nominal values of selected experimental factors and calculated values for Gcode generation: FFF strand width (W) and height (H), volumetric flow rate (Q), FFF strand cross section (Ac), length of filament (1.75 mm diameter) required to extrude 50 mm length of FFF strand with Ac cross-section (E), feed rate (F) and printing speed (S).

| Test ID | H<br>(mm) | W<br>(mm) | Q<br>(mm <sup>3</sup> /s) | Ac<br>(mm <sup>2</sup> ) | E <sup>1</sup><br>(mm) | F <sup>2</sup><br>(mm/min) | S <sup>3</sup><br>(mm/s) | A  | B  | C  |
|---------|-----------|-----------|---------------------------|--------------------------|------------------------|----------------------------|--------------------------|----|----|----|
| TR1-LLL | 0.08      | 0.36      | 1.0                       |                          |                        | 2188                       | 37                       | -1 | -1 | -1 |
| TR1-LLM | 0.08      | 0.36      | 2.5                       | 0.027427                 | 0.570132               | 5470                       | 91                       | -1 | -1 | 0  |
| TR1-LLH | 0.08      | 0.36      | 4.0                       |                          |                        | 8752                       | 146                      | -1 | -1 | 1  |
| TR2-MLL | 0.16      | 0.36      | 1.0                       |                          |                        | 1152                       | 19                       | 0  | -1 | -1 |
| TR2-MLM | 0.16      | 0.36      | 2.5                       | 0.052106                 | 1.083162               | 2878                       | 48                       | 0  | -1 | 0  |
| TR2-MLH | 0.16      | 0.36      | 4.0                       |                          |                        | 4604                       | 76                       | 0  | -1 | 1  |
| TR3-HLL | 0.32      | 0.36      | 1.0                       |                          |                        | 644                        | 11                       | 1  | -1 | -1 |
| TR3-HLM | 0.32      | 0.36      | 2.5                       | 0.093225                 | 1.937918               | 1610                       | 27                       | 1  | -1 | 0  |
| TR3-HLH | 0.32      | 0.36      | 4.0                       |                          |                        | 2576                       | 43                       | 1  | -1 | 1  |
| TR4-LML | 0.08      | 0.48      | 1.0                       |                          |                        | 1620                       | 27                       | -1 | 0  | -1 |
| TR4-LMM | 0.08      | 0.48      | 2.5                       | 0.037027                 | 0.769692               | 4050                       | 68                       | -1 | 0  | 0  |
| TR4-LMH | 0.08      | 0.48      | 4.0                       |                          |                        | 6480                       | 108                      | -1 | 0  | 1  |
| TR5-MML | 0.16      | 0.48      | 1.0                       |                          |                        | 841                        | 14                       | 0  | 0  | -1 |
| TR5-MMM | 0.16      | 0.48      | 2.5                       | 0.071306                 | 1.482284               | 2103                       | 35                       | 0  | 0  | 0  |
| TR5-MMH | 0.16      | 0.48      | 4.0                       |                          |                        | 3364                       | 56                       | 0  | 0  | 1  |
| TR6-HML | 0.32      | 0.48      | 1.0                       |                          |                        | 456                        | 8                        | 1  | 0  | -1 |
| TR6-HMM | 0.32      | 0.48      | 2.5                       | 0.131625                 | 2.736161               | 1140                       | 19                       | 1  | 0  | 0  |
| TR6-HMH | 0.32      | 0.48      | 4.0                       |                          |                        | 1824                       | 30                       | 1  | 0  | 1  |
| TR7-LHL | 0.08      | 0.72      | 1.0                       |                          |                        | 1067                       | 18                       | -1 | 1  | -1 |
| TR7-LHM | 0.08      | 0.72      | 2.5                       | 0.056227                 | 1.168814               | 2668                       | 45                       | -1 | 1  | 0  |
| TR7-LHH | 0.08      | 0.72      | 4.0                       |                          |                        | 4268                       | 71                       | -1 | 1  | 1  |
| TR8-MHL | 0.16      | 0.72      | 1.0                       |                          |                        | 547                        | 9                        | 0  | 1  | -1 |
| TR8-MHM | 0.16      | 0.72      | 2.5                       | 0.109706                 | 2.280527               | 1367                       | 23                       | 0  | 1  | 0  |
| TR8-MHH | 0.16      | 0.72      | 4.0                       |                          |                        | 2188                       | 37                       | 0  | 1  | 1  |
| TR9-HHL | 0.32      | 0.72      | 1.0                       |                          |                        | 288                        | 5                        | 1  | 1  | -1 |
| TR9-HHM | 0.32      | 0.72      | 2.5                       | 0.208425                 | 4.332648               | 720                        | 12                       | 1  | 1  | 0  |
| TR9-HHH | 0.32      | 0.72      | 4.0                       |                          |                        | 1152                       | 19                       | 1  | 1  | 1  |

**Table S2.** Extrudate weight values and under-extrusion percentages for the investigated nominal flow rate values.

| Nominal Flow Rate (mm <sup>3</sup> /s) | Extrudate Weight (g) | SD (g) | Under-extrusion (%) |
|----------------------------------------|----------------------|--------|---------------------|
| 2                                      | 0.594                | 0.004  | 0                   |
| 4                                      | 0.588                | 0.005  | -1                  |
| 6                                      | 0.592                | 0.002  | 0                   |
| 8                                      | 0.583                | 0.004  | -2                  |
| 10                                     | 0.573                | 0.004  | -3                  |
| 12                                     | 0.561                | 0.003  | -6                  |
| 14                                     | 0.536                | 0.012  | -10                 |
| 16                                     | 0.486                | 0.016  | -18                 |
| 18                                     | 0.337                | 0.160  | -43                 |
| 20                                     | 0.317                | 0.041  | -47                 |
| 22                                     | 0.256                | 0.017  | -57                 |
| 24                                     | 0.249                | 0.032  | -58                 |

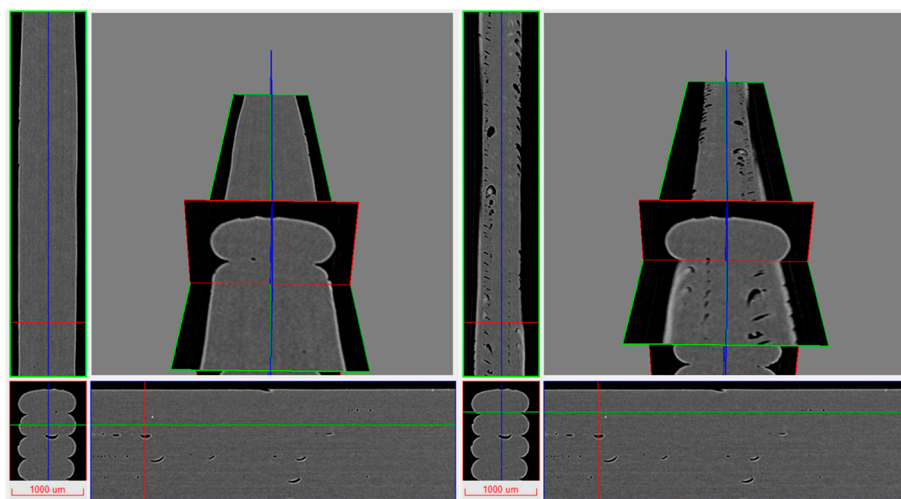**Figure S1.** XZ, XY, ZY single strand cross sections of TR9-HHH sample in main strand volume (left) and in neck region between consecutive strands (DataViewer software v.1.2.5.7, Bruker microCT). Cross section image scale: 1000  $\mu$ m.**Table S3.** Measured resistance and cross section values and calculated resistivity response (total average values for 3 replicates). Reference: 40 mm segment of filament prior to processing

| Test ID | A  | B  | C  | Cross section (mm <sup>2</sup> ) | Resistance (ohm) | SD <sub>R</sub> (ohm) | Resistivity (ohm*cm) | SD <sub>q</sub> (ohm*cm) |
|---------|----|----|----|----------------------------------|------------------|-----------------------|----------------------|--------------------------|
| TR1-LLL | -1 | -1 | -1 | 0.777                            | 4945             | 10                    | 9.61                 | 0.07                     |
| TR1-LLM | -1 | -1 | 0  | 0.787                            | 5166             | 15                    | 10.16                | 0.28                     |
| TR1-LLH | -1 | -1 | 1  | 0.824                            | 5221             | 15                    | 10.76                | 0.78                     |
| TR2-MLL | 0  | -1 | -1 | 0.780                            | 4434             | 20                    | 8.65                 | 0.12                     |
| TR2-MLM | 0  | -1 | 0  | 0.798                            | 4383             | 8                     | 8.75                 | 0.22                     |
| TR2-MLH | 0  | -1 | 1  | 0.775                            | 4427             | 16                    | 8.58                 | 0.03                     |
| TR3-HLL | 1  | -1 | -1 | 0.739                            | 4098             | 10                    | 7.57                 | 0.24                     |
| TR3-HLM | 1  | -1 | 0  | 0.782                            | 3820             | 13                    | 7.47                 | 0.43                     |
| TR3-HLH | 1  | -1 | 1  | 0.742                            | 4154             | 14                    | 7.71                 | 0.20                     |
| TR4-LML | -1 | 0  | -1 | 1.008                            | 3880             | 17                    | 9.78                 | 0.06                     |
| TR4-LMM | -1 | 0  | 0  | 1.028                            | 3929             | 19                    | 10.09                | 0.12                     |

|           |    |   |    |       |      |    |       |      |
|-----------|----|---|----|-------|------|----|-------|------|
| TR4-LMH   | -1 | 0 | 1  | 1.007 | 4142 | 25 | 10.43 | 0.42 |
| TR5-MML   | 0  | 0 | -1 | 0.996 | 3671 | 15 | 9.14  | 0.19 |
| TR5-MMM   | 0  | 0 | 0  | 1.013 | 3454 | 12 | 8.75  | 0.33 |
| TR5-MMH   | 0  | 0 | 1  | 0.967 | 3580 | 12 | 8.65  | 0.36 |
| TR6-HML   | 1  | 0 | -1 | 0.979 | 3487 | 20 | 8.54  | 0.21 |
| TR6-HMM   | 1  | 0 | 0  | 1.003 | 3194 | 15 | 8.01  | 0.11 |
| TR6-HMH   | 1  | 0 | 1  | 0.971 | 3150 | 18 | 7.65  | 0.16 |
| TR7-LHL   | -1 | 1 | -1 | 1.247 | 3982 | 18 | 12.41 | 0.27 |
| TR7-LHM   | -1 | 1 | 0  | 1.357 | 4134 | 20 | 14.02 | 0.27 |
| TR7-LHH   | -1 | 1 | 1  | 1.408 | 3589 | 20 | 12.63 | 0.31 |
| TR8-MHL   | 0  | 1 | -1 | 1.460 | 2793 | 11 | 10.19 | 0.24 |
| TR8-MHM   | 0  | 1 | 0  | 1.457 | 2731 | 10 | 9.95  | 0.24 |
| TR8-MHH   | 0  | 1 | 1  | 1.432 | 2724 | 12 | 9.75  | 0.34 |
| TR9-HHL   | 1  | 1 | -1 | 1.458 | 2805 | 22 | 10.23 | 0.29 |
| TR9-HHM   | 1  | 1 | 0  | 1.444 | 2312 | 15 | 8.35  | 0.04 |
| TR9-HHH   | 1  | 1 | 1  | 1.440 | 2269 | 18 | 8.17  | 0.21 |
| Reference | -  | - | -  | 2.405 | 2063 | 12 | 12.43 | 0.30 |

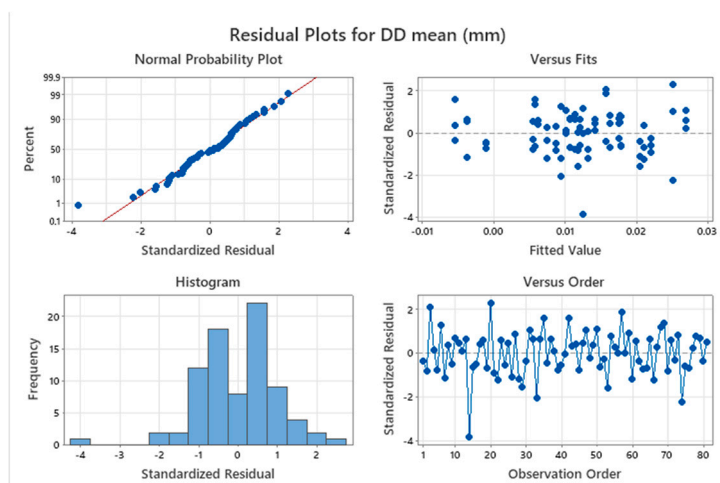

**Figure S2.** Multivariate ANOVA residual plots for  $DD_{mean}$  versus H, W, Q and 1<sup>st</sup> order interaction terms

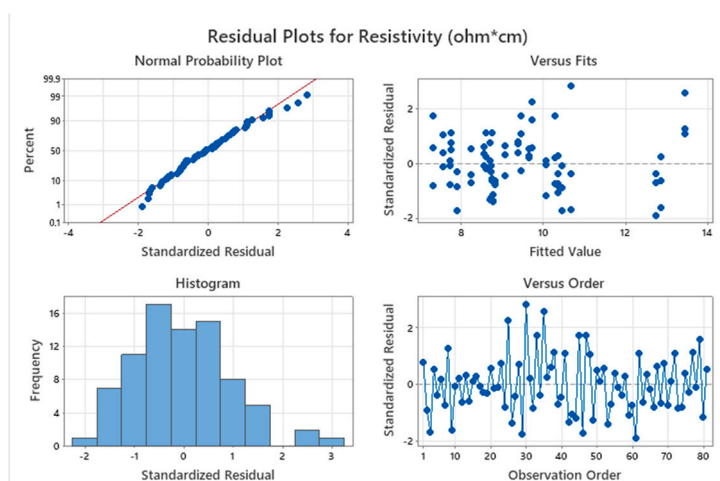

**Figure S3.** Multivariate ANOVA residual plots for  $\rho$  versus H, W, Q and 1<sup>st</sup> order interaction terms

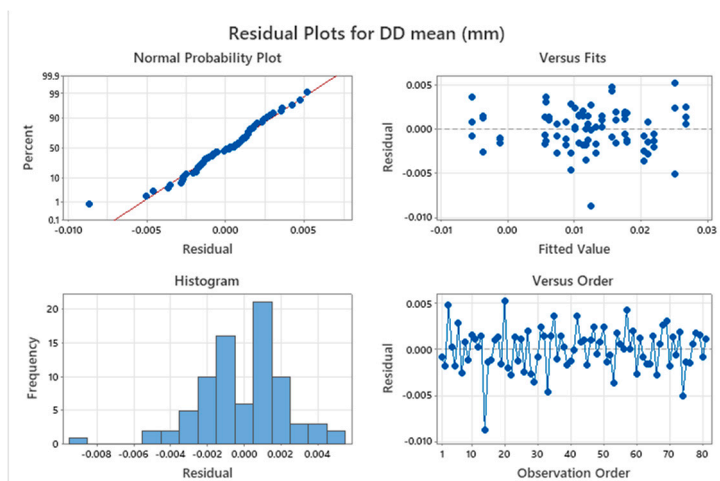

**Figure S4.** Univariate ANOVA residual plots for  $DD_{mean}$  versus H, W, Q and 1<sup>st</sup> order interaction terms

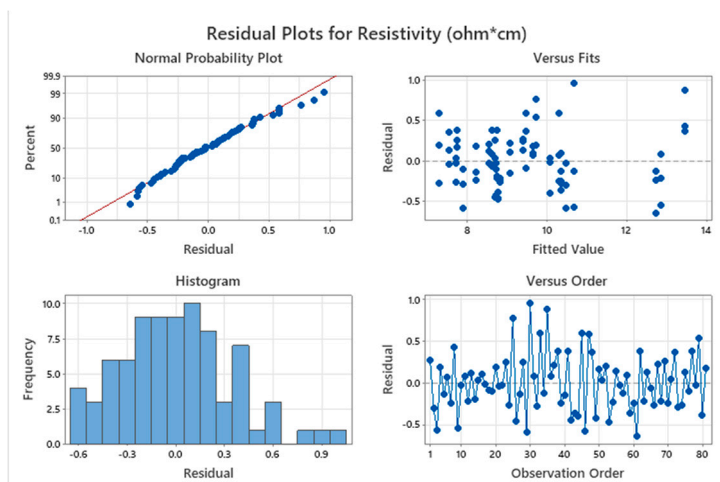

**Figure S5.** Univariate ANOVA residual plots for  $\rho$  versus H, W, Q and 1<sup>st</sup> order interaction terms
